# Supplementary material
Source: PubMed Central journal article supplement (PMC11577336)
Supplement: sj-pdf-1-bjp-10.1177_20494637241300264.pdf [file sj-pdf-1-bjp-10.1177_20494637241300264.pdf]

**Supplementary Table 1:** Characteristics of those rib fracture patients identified by the sensitivity analysis, that started with a daily oral morphine equivalent (OME) dose above the median (>20 OME) and had an increased OME end-dose, compared with the total rib fracture cohort dispensed opioids during the follow-up period.

|                                               | All Rib Fracture Patients with opioids during follow-up (N=2,630) | Flail injuries, commenced on OME above the Median (>20 OME) and had an Increased end dose (N=17) | No further admissions, commenced on OME above the Median (>20 OME) and had an Increased end dose (N=41) |
|-----------------------------------------------|-------------------------------------------------------------------|--------------------------------------------------------------------------------------------------|---------------------------------------------------------------------------------------------------------|
|                                               | N (Col %)                                                         | N (Col %)                                                                                        | N (Col %)                                                                                               |
| <b>DEMOGRAPHIC CHARACTERISTICS</b>            |                                                                   |                                                                                                  |                                                                                                         |
| <b>Sex</b>                                    |                                                                   |                                                                                                  |                                                                                                         |
| Female                                        | 773 (29.4)                                                        | 5 (29.4)                                                                                         | 18 (43.9)                                                                                               |
| Male                                          | 1,857 (70.6)                                                      | 12 (70.6)                                                                                        | 23 (56.1)                                                                                               |
| <b>Age groups</b>                             |                                                                   |                                                                                                  |                                                                                                         |
| 18-44                                         | 735 (27.9)                                                        | ##                                                                                               | 7 (17.1)                                                                                                |
| 45-64                                         | 1,005 (38.2)                                                      | 7 (41.2)                                                                                         | 14 (34.1)                                                                                               |
| 65+                                           | 890 (33.8)                                                        | 7 (41.2)                                                                                         | 20 (48.8)                                                                                               |
| <b>Place of Residence (ARIA) <sup>a</sup></b> |                                                                   |                                                                                                  |                                                                                                         |
| Urban                                         | 1,584 (60.2)                                                      | 9 (52.9)                                                                                         | 23 (56.1)                                                                                               |
| Rural                                         | 992 (37.7)                                                        | 7 (41.2)                                                                                         | 18 (43.9)                                                                                               |
| Remote                                        | 54 (2.1)                                                          | ##                                                                                               | ##                                                                                                      |
| <b>Pre-injury opioid dispensing</b>           |                                                                   |                                                                                                  |                                                                                                         |
| No                                            | 2,249 (85.5)                                                      | 11 (64.7)                                                                                        | 16 (39.0)                                                                                               |
| Yes                                           | 381 (14.5)                                                        | 6 (35.3)                                                                                         | 25 (61.0)                                                                                               |
| <b>INJURY CHARACTERISTICS</b>                 |                                                                   |                                                                                                  |                                                                                                         |
| <b>Rib Fracture Group</b>                     |                                                                   |                                                                                                  |                                                                                                         |
| Single Rib                                    | 591 (22.5)                                                        | ##                                                                                               | 13 (31.7)                                                                                               |
| Multiple Ribs                                 | 1,848 (70.3)                                                      | ##                                                                                               | 23 (56.1)                                                                                               |
| Flail                                         | 191 (7.3)                                                         | 17 (100.0)                                                                                       | 5 (12.2)                                                                                                |
| <b>Concurrent Injuries</b>                    |                                                                   |                                                                                                  |                                                                                                         |
| Isolated                                      | 734 (26.9)                                                        | ##                                                                                               | 16 (39.0)                                                                                               |
| Other injuries                                | 1,996 (73.1)                                                      | 16 (94.1)                                                                                        | 25 (61.0)                                                                                               |
| <b>Mechanism of Injury</b>                    |                                                                   |                                                                                                  |                                                                                                         |
| Fall                                          | 1,146 (43.6)                                                      | ##                                                                                               | 26 (63.4)                                                                                               |
| Transport related                             | 1,203 (45.7)                                                      | 11 (64.7)                                                                                        | 9 (22.0)                                                                                                |

|                                               |              |            |            |
|-----------------------------------------------|--------------|------------|------------|
| Other                                         | 281 (10.7)   | ##         | 6 (14.6)   |
| <b>Injury Severity (ICISS)</b>                |              |            |            |
| Low threat to life (SRR>0.941)                | 1,657 (63.0) | ##         | 21 (51.2)  |
| High threat to life (SRR≤0.941)               | 973 (37.0)   | 13 (76.5)  | 20 (48.8)  |
| <b>INDEX HOSPITALISATION CHARACTERISTICS</b>  |              |            |            |
| <b>Length of Stay (LOS) in days</b>           |              |            |            |
| ≤ 21 days                                     | 2,379 (90.5) | 13 (76.5)  | 34 (82.9)  |
| > 21 days                                     | 251 (9.5)    | ##         | 7 (17.1)   |
| <b>Surgery performed</b>                      |              |            |            |
| No                                            | 2,172 (82.6) | 11 (64.7)  | 35 (85.4)  |
| Yes                                           | 458 (17.4)   | 6 (35.3)   | 6 (14.6)   |
| <b>ICU Admission</b>                          |              |            |            |
| No                                            | 2,395 (91.1) | 12 (70.6)  | 38 (92.7)  |
| Yes                                           | 235 (8.9)    | 5 (29.4)   | ##         |
| <b>FOLLOW-UP PERIOD CHARACTERISTICS</b>       |              |            |            |
| <b>Number of Hospitalisations (all cause)</b> |              |            |            |
| 0                                             | 1,096 (41.7) | 5 (29.4)   | 41 (100.0) |
| 1                                             | 630 (24.0)   | ##         | ##         |
| 2-4                                           | 623 (23.7)   | 6 (35.3)   | ##         |
| 5+                                            | 281 (10.7)   | ##         | ##         |
| <b>Died (all cause)</b>                       |              |            |            |
| No                                            | 2,449 (93.1) | 17 (100.0) | 32 (78.1)  |
| Yes                                           | 181 (6.9)    | ##         | 9 (21.9)   |

<sup>a</sup> ARIA - Accessibility/Remoteness Index of Australia

## Information suppressed where cell counts < 5.
